# Supplementary material
Source: Springer Nature journal article supplement (https://www.springermedizin.de/resource/supplementary/13011_2007_82_MOESM3_ESM.pdf/9628354)

**Relative Incidence of Selected Continuous Variables**  
**- Crude Rates**

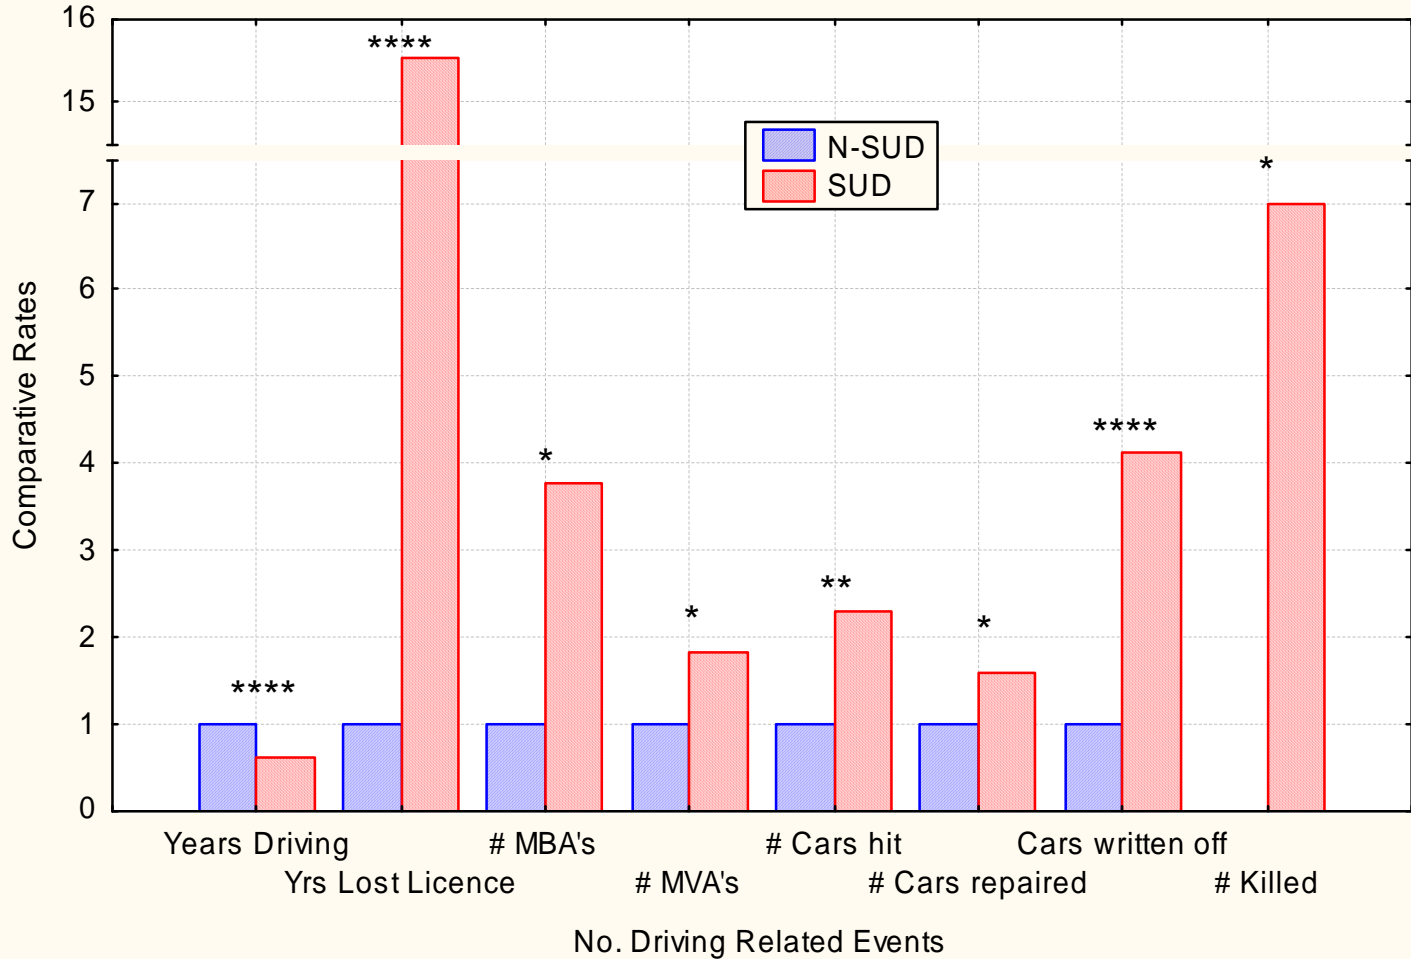

Supplement: MOESM3 [file 9628354]
